# Supplementary material
Source: PubMed Central journal article supplement (PMC5952400)
Supplement: JB.00726-17_zjb999094754s1.pdf [file JB.00726-17_zjb999094754s1.pdf]

**Supplementary Information for:**

**Esx paralogs are functionally equivalent to ESX-1 proteins but are dispensable for virulence in *M. marinum***

Rachel E. Bosserman\*, Cristal Reyna Thompson, Kathleen R. Nicholson, and Patricia A. Champion#

Department of Biological Sciences, University of Notre Dame, Notre Dame, Indiana, USA

Running Head: Gene duplications of ESX-1 virulence factors

# Address correspondence to Patricia A. Champion, [pchampion@nd.edu](mailto:pchampion@nd.edu)

\* Present address: Rachel E. Bosserman, The University of Texas Health Science Center at Houston, Houston, Texas, USA.

**Contents:**

**Supplementary Methods**

**Table S1: *M. marinum* strains used in this study**

**Figure S1. The *esxB\_1* gene is dispensable for cytotoxicity to RAW cells**

**Figure S2. *M. tb* EsxB in *M. marinum* is recognized for ESX-1 export by its C-terminus.**

**Figure S3. The EsxB\_2 protein differs from and is not functionally equivalent to EsxB.**

**Figure S4. The *esx-6* locus is partially present in some *M. ulcerans* strains.**

**References**

## Supplementary Methods

**Crystal violet assay.**  $5 \times 10^5$  RAW 264.7 cells were seeded overnight in a 24 well TC treated plate (CELLSTAR, Greiner Bio-one, Monroe, NC). Bacteria were grown in 7H9 broth for 3 days, washed three times with sterile PBS and syringe passaged to break up clumps. RAW 264.7 cells were incubated with  $1 \times 10^6$  bacteria (MOI 2) for 2 hours at 37°C. Each infection was performed in technical triplicate. Wells were treated with 100µg/mL gentamycin for 1 hour at 37°C to kill extracellular bacteria. Each well was washed three times with PBS and then replenished with DMEM media containing FBS. After 2 days, the media was removed and the cells were fixed with 4% paraformaldehyde (PFA) in PBS for 10 min. at room temperature. The wells were stained with 0.1% crystal violet (Alfa Aesar) in dH<sub>2</sub>O for 30 min. at room temperature, with gentle rocking. The plate was washed by carefully submerging in a tray of distilled water, under running water until the rinses were clear. The plate was allowed to dry completely and then imaged with a camera.

**Table S1. *M. marinum* strains used in this study.**

| Strain                                                                 | Description                                                                                                                                                                                                       | Reference                   |
|------------------------------------------------------------------------|-------------------------------------------------------------------------------------------------------------------------------------------------------------------------------------------------------------------|-----------------------------|
| M                                                                      | Wild-type strain (WT)                                                                                                                                                                                             | ATCC BAA-535                |
| ΔRD1                                                                   | Unmarked deletion of <i>eccCb<sub>1</sub>'-espK'</i>                                                                                                                                                              | (1)                         |
| ΔRD1 Δ <i>esxB</i> _1                                                  | ΔRD1, unmarked deletion of <i>esxB</i> _1 ( <i>MMAR_0187</i> )                                                                                                                                                    | This study                  |
| Δ <i>esxBA</i>                                                         | Δ <i>esxBA</i> , Kan <sup>r</sup>                                                                                                                                                                                 | (2)                         |
| Δ <i>esxBA</i> /p <sub>Mops</sub> <i>esxBA</i>                         | Δ <i>esxBA</i> , p <sub>Mops</sub> <i>esxBA</i> integrated at the <i>attB</i> site; Kan <sup>r</sup> , Hyg <sup>r</sup>                                                                                           | This study                  |
| Δ <i>esxBA</i> /p <sub>Mops</sub> <i>esxB</i> _1- <i>esxA</i> _3       | Δ <i>esxBA</i> , p <sub>Mops</sub> <i>esxB</i> _1- <i>esxA</i> _3 integrated at the <i>attB</i> site; Kan <sup>r</sup> , Hyg <sup>r</sup>                                                                         | This study                  |
| Δ <i>esxBA</i> /p <sub>Mops</sub> <i>esxB</i> _1 M98A - <i>esxA</i> _3 | Δ <i>esxBA</i> , p <sub>Mops</sub> <i>esxB</i> _1 M98A - <i>esxA</i> _3 integrated at the <i>attB</i> site; Kan <sup>r</sup> , Hyg <sup>r</sup>                                                                   | This study                  |
| Δ <i>esxBA</i> /p <sub>Mops</sub> <i>esxB</i> _2- <i>esxA</i> _2       | Δ <i>esxBA</i> , p <sub>Mops</sub> <i>esxB</i> _2- <i>esxA</i> _2 integrated at the <i>attB</i> site; Kan <sup>r</sup> , Hyg <sup>r</sup>                                                                         | This study                  |
| Δ <i>esxBA</i> /pMH406                                                 | Δ <i>esxBA</i> , pMH406 integrated at the <i>attB</i> site; Kan <sup>r</sup> , Hyg <sup>r</sup> . The pMH406 plasmid includes the <i>esxBA</i> genes from <i>M. tb</i> behind the mycobacterial optimal promoter. | Gift from Jeff Cox, and (3) |
| Δ <i>esxBA</i> /pMH406 <i>esxB</i> L94A                                | Δ <i>esxBA</i> , pMH406 <i>esxB</i> L94A integrated at the <i>attB</i> site; Kan <sup>r</sup> , Hyg <sup>r</sup>                                                                                                  | This study                  |
| Δ <i>esxBA</i> /pMH406 <i>esxB</i> S95A                                | Δ <i>esxBA</i> , pMH406 <i>esxB</i> S95A integrated at the <i>attB</i> site; Kan <sup>r</sup> , Hyg <sup>r</sup>                                                                                                  | This study                  |
| Δ <i>esxBA</i> /pMH406 <i>esxB</i> S96A                                | Δ <i>esxBA</i> , pMH406 <i>esxB</i> S96A integrated at the <i>attB</i> site; Kan <sup>r</sup> , Hyg <sup>r</sup>                                                                                                  | This study                  |
| Δ <i>esxBA</i> /pMH406 <i>esxB</i> Q97A                                | Δ <i>esxBA</i> , pMH406 <i>esxB</i> Q97A integrated at the <i>attB</i> site; Kan <sup>r</sup> , Hyg <sup>r</sup>                                                                                                  | This study                  |
| Δ <i>esxBA</i> /pMH406 <i>esxB</i> M98A                                | Δ <i>esxBA</i> , pMH406 <i>esxB</i> M98A integrated at the <i>attB</i> site; Kan <sup>r</sup> , Hyg <sup>r</sup>                                                                                                  | This study                  |
| Δ <i>esxBA</i> /pMH406 <i>esxB</i> G99A                                | Δ <i>esxBA</i> , pMH406 <i>esxB</i> G99A integrated at the <i>attB</i> site; Kan <sup>r</sup> , Hyg <sup>r</sup>                                                                                                  | This study                  |
| Δ <i>esxBA</i> /pMH406 <i>esxB</i> F100A                               | Δ <i>esxBA</i> , pMH406 <i>esxB</i> F100A integrated at the <i>attB</i> site; Kan <sup>r</sup> , Hyg <sup>r</sup>                                                                                                 | This study                  |
| Δ <i>esxB</i> _1                                                       | Unmarked deletion of <i>esxB</i> _1 ( <i>MMAR_0187</i> )                                                                                                                                                          | This study                  |
| Δ <i>esxB</i> _1/p <sub>Mops</sub> <i>esxB</i> _1- <i>esxA</i> _3      | Δ <i>esxB</i> _1, p <sub>Mops</sub> <i>esxB</i> _1- <i>esxA</i> _3 integrated at the <i>attB</i> site; Hyg <sup>r</sup>                                                                                           | This study                  |
| Δ <i>MMAR_0184-esxA</i> _2 (ΔextESX-6)                                 | Unmarked deletion of <i>MMAR_0184-MMAR_0196</i>                                                                                                                                                                   | This study                  |

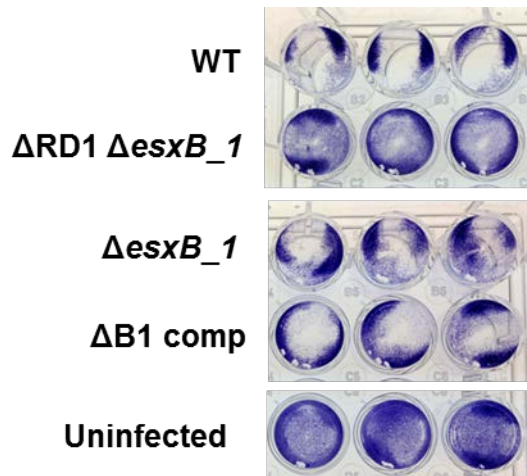

**Figure S1. The *esxB\_1* gene is dispensable for cytotoxicity to RAW cells.** RAW264.7 cells were infected with *M. marinum* strains at an MOI of 2. 2 days post infection, the cells were fixed and stained with crystal violet. Clearing of the RAW cell monolayer indicates cytotoxicity. The figure is representative of 3 independent infections with each strain tested in triplicate.

A.

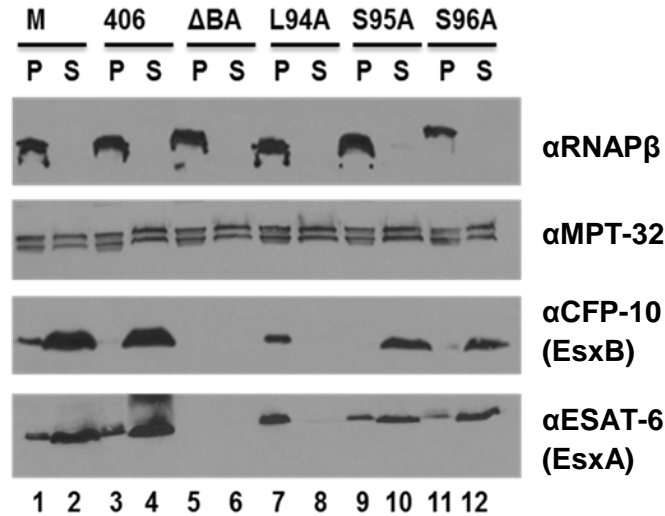

B.

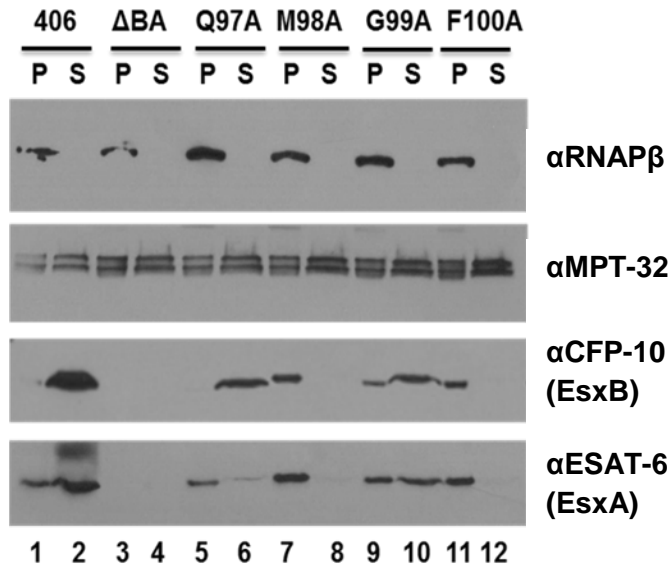

**Figure S2. *M. tb* EsxB in *M. marinum* is recognized for ESX-1 export by its C-terminus.** EsxB<sub>MT</sub> are secreted from *M. marinum* as demonstrated by an ESX-1 secretion assay. 10μg of protein was loaded. “M” is the *M. marinum* WT strain. “406” refers to the Δ*esxBA*/pMH406 strain. “ΔBA” refers to the Δ*esxBA* strain. The remaining strains are Δ*esxBA*/pMH406 strains which encode a mutagenized EsxB<sub>MT</sub> protein from an integrated plasmid (e.g. Δ*esxBA*/pMH406 *esxB* L94A). RNAP-β serves as a lysis control. Mpt-32, a Sec-secreted protein, is the loading control. *In vitro* production (P, pellet) and secretion (S, supernatant) of ESX-1 substrates, CFP-10 (EsxB) and ESAT-6 (EsxA) were analyzed. The western blot is representative of 3 independent experiments.

**A.**

```

Mtb EsxB 1 MAEMKTDAAATLAQEAGNFERISGDLKTQIDQVESTAGSLQCGQWRGAAGTAAQAAVVRFQE
Mm EsxB 1 MAEMKTDAAATLAQEAGNFERISGDLKTQIDQVESTAGSLQAQWRGAAGTAAQAAVVRFQE
Mm EsxB_1 1 MAEMKTDAAATLAQEAGNFERISGDLKTQIDQVESTAGSLQAQWRGAAGTAAQAAVVRFQE
Mm EsxB_2 1 MAEMKTDAAATLTGQAHQFERIADDLKASIRRVETTAAGLLAWRGDAGHAAQAAITALEHQ

61 AANKQKQELDEISTNIRQAGVQYSRADDEQQQALSSQMGF
61 AANKQKAELDEISTNIRQAGVQYSRADDEQQQALSSQMGF
61 AANKQKAELDEISTNIRQAGVQYSRADDEQQQALSSQMGF
61 AATQQVKKLNEISTKIWTAAQDYTDTDHETGLSNQMNF

```

**B.**

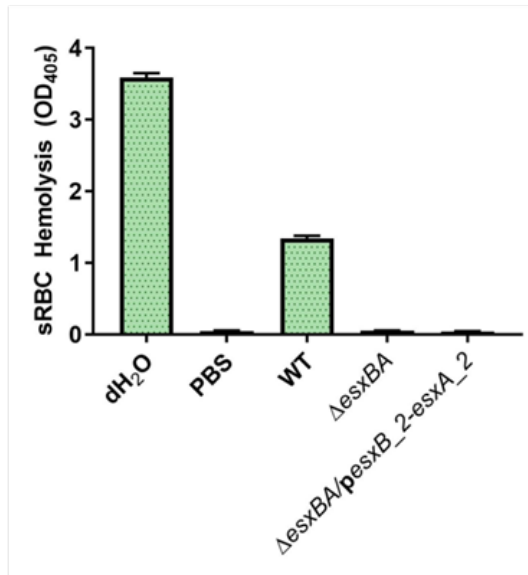

**Figure S3. The EsxB\_2 protein differs from and is not functionally equivalent to EsxB, (A)** Alignment of the *M. tb* EsxB, *M. marinum* EsxB, *M. marinum* EsxB\_1, and *M. marinum* EsxB\_2 protein sequences. *M. marinum* EsxB and EsxB\_1 are 100% identical at the protein level. The *M. marinum* EsxB and EsxB\_1 proteins differ from *M. tb* EsxB by 3 amino acid residues. While the first 11 amino acids of the EsxB\_2 protein are completely conserved among all EsxB proteins shown here, the remaining protein sequence shows variation. There is lack of conservation of the ESX-1 C-terminus (last 7 amino acids). **(B)** Introduction of an *esxB\_2* expression plasmid does not restore hemolytic activity to the Δ*esxBA* strain, demonstrating the EsxB\_2 and EsxA\_2 proteins are not functionally equivalent to the EsxBA proteins. 3 isolates were tested. Error bars represent the standard deviation of three technical replicates.

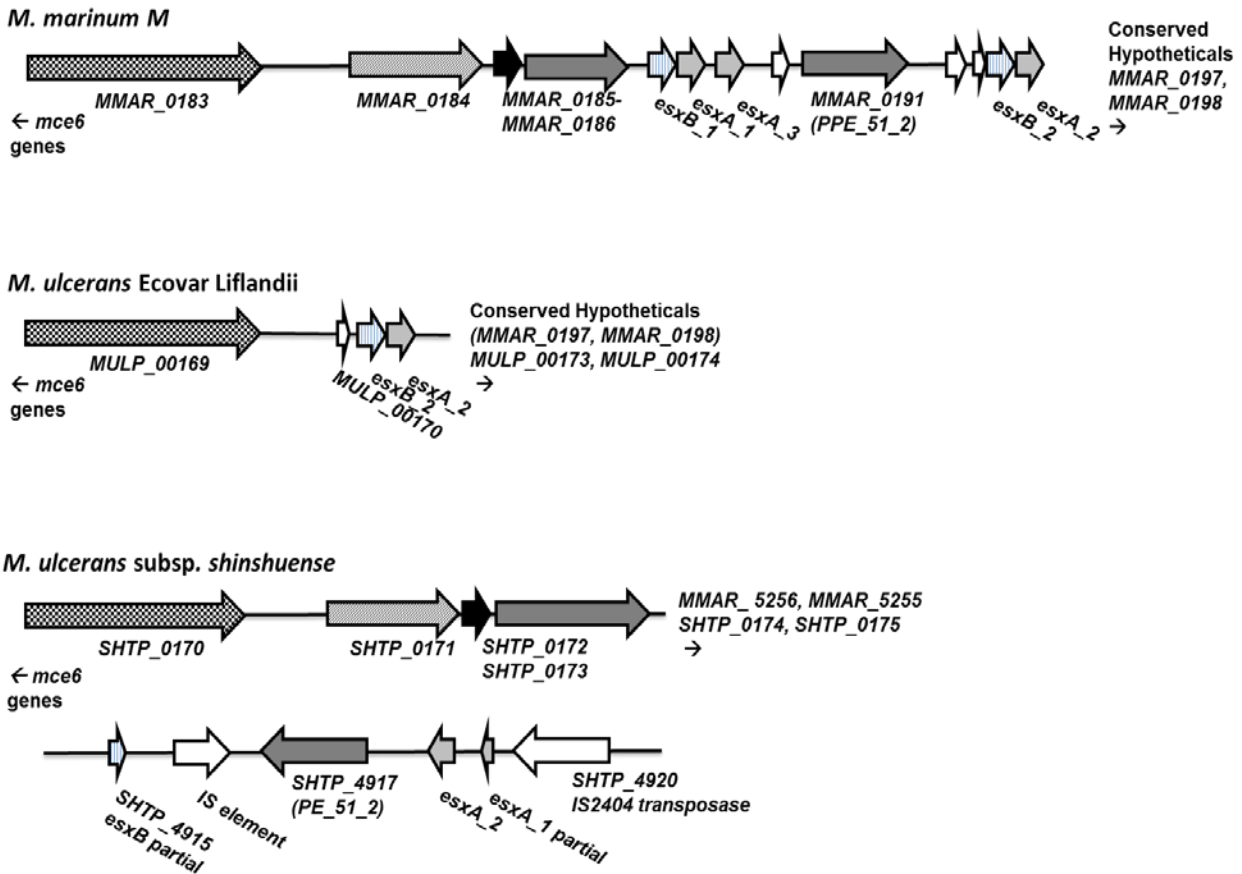

**Figure S4. The *esx-6* locus is partially present in some *M. ulcerans* strains.** Upstream of the *Esx-6* region is *MMAR\_0183*, which encodes a PE-PGRS family protein. *MMAR\_0183* is found in both *M. ulcerans* strains depicted. The *M. ulcerans* ecovar Liflandii strain has the *esxB\_2* locus. *MMAR\_0184*, the *eccB* paralog and *pe35/pe68\_1* orthologs are present in *M. ulcerans* susp. *shinshuense*. The *esxB\_1* and *esxB\_2* loci are incomplete in this strain and found in a different area of the chromosome

## References

1. **Volkman HE, Clay H, Beery D, Chang JC, Sherman DR, Ramakrishnan L.** 2004. Tuberculous granuloma formation is enhanced by a mycobacterium virulence determinant. *PLoS Biol* **2**:e367.
2. **Gao LY, Guo S, McLaughlin B, Morisaki H, Engel JN, Brown EJ.** 2004. A mycobacterial virulence gene cluster extending RD1 is required for cytolysis, bacterial spreading and ESAT-6 secretion. *Mol Microbiol* **53**:1677-1693.
3. **Guinn KM, Hickey MJ, Mathur SK, Zakei KL, Grotzke JE, Lewinsohn DM, Smith S, Sherman DR.** 2004. Individual RD1-region genes are required for export of ESAT-6/CFP-10 and for virulence of *Mycobacterium tuberculosis*. *Mol Microbiol* **51**:359-370.
